# Supplementary material
Source: publisher site journal article supplement (https://www.dovepress.com/article/230946)
Supplement: Supplementary file 1 [file get_supplementary_file.php]

**Students in transition**

**Focus Group Pro forma**

**Moderator**

**“Welcome and thank you for coming”.**

You would have read the participant information sheet which was handed out to you at the end of the lecture. Please read again and sign the consent form please. We wish to remind you that this is confidential and will not have any bearing on your relationship with the university, hospital or your progress as a medical student.

The aim of this study is to see how you are progressing as third year medical students and to elicit information on your hospital experience and working as part of a team.

The outcomes of this study will provide insight into how you procedural skills are progressing as well as how you are working within the team and may be helpful to future medical students

This session will be tape- recorded. For the purpose of confidentiality please do not disclose the name of others.

I want you to think about your rotations starting from the first rotation.

**1. “What was your experience in working as part of the hospital team”?**

**Prompts** “Was your ward/operating theatre what you had expected?

Did your supervisors greet you? Did your supervisors provide you with direction?

Can you tell me the roles of the professionals that you had interaction with? Can you describe the interactions that you had? Did they exhibit professionalism?

Could you tell me if the professional skills that you have learnt in communications were /were not played out in the clinical environment? Can you give an example of a situation please?

Did you consider the member of the team to be good role models for you as a future doctor?

How?

**2. Can you comment on your procedural skills progress and opportunity to perform on the wards?**

(Asks the group question regarding procedural skills performed so far such as cannulation venepuncture etc.)

Can you tell me more about your procedural skill performance please, “Were you supervised”? Who was your supervisor? Was feedback provided on your performance? Do you feel confident to perform the skill again? Do or feel that you were able to use your communication skills to talk to the patient? Do you feel that you had a positive interaction with your patient? Did your patient appear receptive to having a medical student perform the procedure?

**3. Finally**

**“Can you provide tips for students who will be going into Year three next year please”?**

**For example “what would provisions would you take to make a student feel part of the team”?**
